# Supplementary material for: Jorge Martín: Director comercial de Iberian Food Trade
Source: Atypon-hosted journal article supplement (doi:10.1056/nejmoa041406), 2012-01-01
Supplement: 1838sa1.pdf [file 1838sa1.pdf]

## Supplementary Appendix

This appendix has been provided by the authors to give readers additional information about their work.

Supplement to: Landrigan CP, Rothschild JM, Cronin JW, et al. Effect of reducing interns' work hours on serious medical errors in intensive care units. *N Engl J Med* 2004;351:1838-48.

Figure A (Online only)

| <b>ICU SIGNOUT</b>                          |                                  |
|---------------------------------------------|----------------------------------|
| <b>Patient</b>                              | _____                            |
| <b>To Do List</b>                           |                                  |
| 1.                                          |                                  |
| 2.                                          |                                  |
| 3.                                          |                                  |
| <b>Critical issues/ unstable situations</b> |                                  |
| 1.                                          |                                  |
| 2.                                          |                                  |
| 3.                                          |                                  |
| <b>Active medical problems</b>              |                                  |
| 1. Resp-                                    | Ventilator settings, ABGs, goals |
| 2. CV-                                      | Hemodynamic status/ PAC data     |
| 3. Neuro-                                   |                                  |
| 4. Renal-Lytes-Endo-                        |                                  |
| 5. GI-Nutrition-                            |                                  |
| 6. Heme-                                    |                                  |
| 7. ID, other-                               |                                  |
| 8. Code status-                             |                                  |
| 9. Family issues/contacts-                  |                                  |
| <b>Notes</b>                                |                                  |

**Supplemental Table A (for the electronic version of the manuscript only): Error Subtypes**

**a) Serious Intern Medication Error Subtypes\***

|                                                     | Number of Errors on<br>Traditional Schedule<br>(Rate/1000 Patient-Days) | Number of Errors on<br>Intervention Schedule<br>(Rate/1000 Patient-Days) |
|-----------------------------------------------------|-------------------------------------------------------------------------|--------------------------------------------------------------------------|
| <b>Serious Intern Medication Errors —<br/>Total</b> | <b>129 (99.7)</b>                                                       | <b>75 (82.5)</b>                                                         |
| Wrong medication                                    | 10 (7.7)                                                                | 11 (12.1)                                                                |
| Wrong dose                                          | 44 (34.0)                                                               | 29 (31.9)                                                                |
| Wrong route                                         | 6 (4.6)                                                                 | 2 (2.2)                                                                  |
| Wrong frequency                                     | 4 (3.1)                                                                 | 2 (2.2)                                                                  |
| Wrong rate                                          | 5 (3.9)                                                                 | 0 (0)                                                                    |
| Drug-drug interaction                               | 2 (1.5)                                                                 | 0 (0)                                                                    |
| Omitted medication                                  | 10 (7.7)                                                                | 4 (4.4)                                                                  |
| Failure to discontinue medication                   | 14 (10.8)                                                               | 5 (5.5)                                                                  |
| Duplicate order                                     | 13 (10.0)                                                               | 8 (8.8)                                                                  |
| Wrong patient                                       | 8 (6.2)                                                                 | 5 (5.5)                                                                  |
| Not otherwise classified                            | 13 (10.0)                                                               | 9 (9.9)                                                                  |

\* primary subtype reported only; mutually exclusive categories

**b) Serious Intern Procedural, Diagnostic, and Other Error Subtypes\***

|                                                                                | Number of Errors on<br>Traditional Schedule<br>(Rate/1000 Patient-Days) | Number of Errors on<br>Intervention Schedule<br>(Rate/1000 Patient-Days) |
|--------------------------------------------------------------------------------|-------------------------------------------------------------------------|--------------------------------------------------------------------------|
| <b>Serious Procedural Errors</b>                                               | <b>11 (8.5)</b>                                                         | <b>6 (6.6)</b>                                                           |
| Failure to take precautions or follow protocol to prevent<br>accidental injury | 3 (2.3)                                                                 | 4 (4.4)                                                                  |
| Injury due to technical error                                                  | 0 (0)                                                                   | 2 (2.2)                                                                  |
| Injury due to failure to adequately assess patient before procedure            | 2 (1.5)                                                                 | 0 (0)                                                                    |
| Preventable self-extubation / central line removal by patient                  | 0 (0)                                                                   | 1 (1.1)                                                                  |
| Failure to order needed procedure or follow-up test                            | 0 (0)                                                                   | 0 (0)                                                                    |
| Failure to take precautions to prevent injury                                  | 1 (0.8)                                                                 | 1 (1.1)                                                                  |
| Inadequate training or supervision                                             | 2 (1.5)                                                                 | 0 (0)                                                                    |
| Inadequate reporting or communication                                          | 1 (0.8)                                                                 | 0 (0)                                                                    |
| Avoidable treatment delays                                                     | 1 (0.8)                                                                 | 1 (1.1)                                                                  |
| Wrong side prepared for procedure                                              | 1 (0.8)                                                                 | 0 (0)                                                                    |
| Failure to check equipment                                                     | 1 (0.8)                                                                 | 1 (1.1)                                                                  |
| Other procedural errors                                                        | 2 (1.5)                                                                 | 0 (0)                                                                    |

|                                                              |                  |                |
|--------------------------------------------------------------|------------------|----------------|
| <b>Serious Diagnostic Errors</b>                             | <b>24 (18.6)</b> | <b>3 (3.3)</b> |
| Errors in history taking or physical examination             | 11 (8.5)         | 1 (1.1)        |
| Avoidable delay in diagnosis due to delayed examination      | 2 (1.5)          | 1 (1.1)        |
| Incomplete history or physical exam, leading to misdiagnosis | 5 (3.9)          | 0 (0)          |
| Misinterpretation of physical exam findings                  | 2 (1.5)          | 0 (0)          |
| Other error in performance of history or physical            | 2 (1.5)          | 0 (0)          |
| Avoidable delay in ordering diagnostic test                  | 2 (1.5)          | 0 (0)          |
| Failure to act on test results                               | 4 (3.1)          | 1 (1.1)        |
| Wrong diagnostic test ordered                                | 1 (0.8)          | 0 (0)          |
| Misinterpretation of test results                            | 0 (0)            | 1 (1.1)        |
| Test ordered / interpreted for wrong patient                 | 1 (0.8)          | 0 (0)          |
| Other diagnostic errors                                      | 5 (3.9)          | 0 (0)          |
| <b>Other Serious Errors</b>                                  | <b>12 (9.3)</b>  | <b>7 (7.7)</b> |
| Failure to take precautions                                  | 3 (2.3)          | 0 (0)          |
| Inadequate reporting / communication                         | 2 (1.5)          | 2 (2.2)        |
| Other                                                        | 7 (5.4)          | 5 (5.5)        |

\* primary subtype reported only; mutually exclusive categories

c) **All Serious Medication Error Subtypes\***

|                                          | Number of Errors on<br>Traditional Schedule<br>(Rate/1000 Patient-Days) | Number of Errors on<br>Intervention Schedule<br>(Rate/1000 Patient-Days) |
|------------------------------------------|-------------------------------------------------------------------------|--------------------------------------------------------------------------|
| <b>Serious Medication Errors – Total</b> | <b>175 (135.2)</b>                                                      | <b>105 (115.5)</b>                                                       |
| Wrong medication                         | 15 (11.6)                                                               | 14 (15.4)                                                                |
| Wrong dose                               | 67 (51.8)                                                               | 39 (42.9)                                                                |
| Wrong route                              | 8 (6.2)                                                                 | 3 (3.3)                                                                  |
| Wrong frequency                          | 6 (4.6)                                                                 | 4 (4.4)                                                                  |
| Wrong rate                               | 6 (4.6)                                                                 | 0 (0)                                                                    |
| Drug-drug interaction                    | 3 (2.3)                                                                 | 0 (0)                                                                    |
| Omitted medication                       | 11 (8.5)                                                                | 6 (6.6)                                                                  |
| Failure to discontinue medication        | 14 (10.8)                                                               | 8 (8.8)                                                                  |
| Duplicate order                          | 18 (13.9)                                                               | 11 (12.1)                                                                |
| Wrong patient                            | 9 (7.0)                                                                 | 6 (6.6)                                                                  |
| Not otherwise classified                 | 18 (13.9)                                                               | 14 (15.4)                                                                |

\* primary subtype reported only; mutually exclusive categories

**d) All Procedural, Diagnostic, and Other Error Subtypes\***

|                                                                             | Number of Errors on<br>Traditional Schedule<br>(Rate/1000 Patient-Days) | Number of Errors on<br>Intervention Schedule<br>(Rate/1000 Patient-Days) |
|-----------------------------------------------------------------------------|-------------------------------------------------------------------------|--------------------------------------------------------------------------|
| <b>Serious Procedural Errors</b>                                            | <b>18 (13.9)</b>                                                        | <b>11 (12.1)</b>                                                         |
| Failure to take precautions or follow protocol to prevent accidental injury | 6 (4.6)                                                                 | 7 (7.7)                                                                  |
| Injury due to technical error                                               | 0 (0)                                                                   | 3 (3.3)                                                                  |
| Injury due to failure to adequately assess patient before procedure         | 2 (1.5)                                                                 | 0 (0)                                                                    |
| Preventable self-extubation / central line removal by patient               | 0 (0)                                                                   | 2 (2.2)                                                                  |
| Failure to order needed procedure or follow-up test                         | 2 (1.5)                                                                 | 0 (0)                                                                    |
| Failure to take precautions to prevent injury                               | 2 (1.5)                                                                 | 2 (2.2)                                                                  |
| Inadequate training or supervision                                          | 3 (2.3)                                                                 | 0 (0)                                                                    |
| Inadequate reporting or communication                                       | 1 (0.8)                                                                 | 0 (0)                                                                    |
| Avoidable treatment delays                                                  | 1 (0.8)                                                                 | 1 (1.1)                                                                  |
| Wrong side prepared for procedure                                           | 1 (0.8)                                                                 | 0 (0)                                                                    |
| Failure to check equipment                                                  | 1 (0.8)                                                                 | 2 (2.2)                                                                  |
| Other procedural errors                                                     | 5 (3.9)                                                                 | 1 (1.1)                                                                  |

|                                                              |                  |                  |
|--------------------------------------------------------------|------------------|------------------|
| <b>Serious Diagnostic Errors</b>                             | <b>28 (21.6)</b> | <b>10 (11.0)</b> |
| Errors in history taking or physical examination             | 11 (8.5)         | 3 (3.3)          |
| Avoidable delay in diagnosis due to delayed examination      | 2 (1.5)          | 2 (2.2)          |
| Incomplete history or physical exam, leading to misdiagnosis | 5 (3.9)          | 0 (0)            |
| Misinterpretation of physical exam findings                  | 2 (1.5)          | 1 (1.1)          |
| Other error in performance of history or physical            | 2 (1.5)          | 0 (0)            |
| Avoidable delay in ordering diagnostic test                  | 4 (3.1)          | 1 (1.1)          |
| Failure to act on test results                               | 4 (3.1)          | 2 (2.2)          |
| Wrong diagnostic test ordered                                | 1 (0.8)          | 0 (0)            |
| Misinterpretation of test results                            | 1 (0.8)          | 1 (1.1)          |
| Test ordered / interpreted for wrong patient                 | 2 (1.5)          | 0 (0)            |
| Other diagnostic errors                                      | 5 (3.9)          | 3 (3.3)          |
| <b>Other Serious Errors</b>                                  | <b>29 (22.4)</b> | <b>18 (19.8)</b> |
| Failure to take precautions                                  | 11 (8.5)         | 3 (3.3)          |
| Inadequate reporting / communication                         | 5 (3.9)          | 3 (3.3)          |
| Other                                                        | 13 (10.0)        | 12 (13.2)        |

\* primary subtype reported only; mutually exclusive categories
